# Supplementary material for: The Transitional Wettability on Bamboo-Leaf-like Hierarchical-Structured Si Surface Fabricated by Microgrinding
Source: MDPI journal article supplement (doi:10.3390/nano12162888), 2022-08-22
Supplement: s1 [file s1]

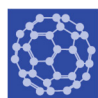

Supplementary Material

# The Transitional Wettability on Bamboo-Leaf-Like Hierarchical-Structured Si Surface Fabricated by Microgrinding

Ping Li, Jinxin Wang, Jiale Huang and Jianhua Xiang \*

School of Mechanical and Electric Engineering, Guangzhou University, Guangzhou 510006, China

\* Correspondence: xiangjh@gzhu.edu.cn

**Table S1.** Particle size conversion chart.

| Grinding wheel type | Particle size ( $\mu\text{m}$ ) |
|---------------------|---------------------------------|
| SD60                | 250                             |
| SD120               | 124                             |
| SD320               | 44                              |
| SD600               | 21                              |
| SD1200              | 12                              |
| SD2000              | 6.5                             |
| SD3000              | 5                               |

**Movie S1:** A water droplet is split up equally by two pieces of BLHS surface.

**Movie S2:** The water droplet on the modified BLHS surface is totally taken away by a BLHS surface.

**Movie S3:** The droplet is running with the needle without volume loss.

**Movie S4:** The droplet on the modified BLHS surface completely self-sucks into a hollow tubing rapidly without the help of external forces.

**Movie S5:** The water droplet rests on the BLHS surface without self-sucking phenomenon.

**Movie S6:** Comparison of droplet manipulation on the BLHS surface and modified BLHS surface.
