# Supplementary material for: The Transitional Wettability on Bamboo-Leaf-like Hierarchical-Structured Si Surface Fabricated by Microgrinding
Source: Nanomaterials (Basel). 2022 Aug 22;12(16):2888. doi: 10.3390/nano12162888 (PMC9412647; doi:10.3390/nano12162888)
Supplement: Supplementary file 1 [file nanomaterials-12-02888-s001.zip]

Archive with 7 entries (7 files):
- Movie S1-Droplet Split.mp4
- Movie S2-Droplet Took Away.mp4
- Movie S3 Droplet Run with Needle.mp4
- Movie S4 Droplet self-Sucks into tube.mp4
- Movie S5 Droplet Rests on the Surface.mp4
- Movie S6 Comparison.mp4
- nanomaterials-1851818 supplementary.pdf
